# Supplementary material for: Highly flexible and transparent metal grids made of metal nanowire networks
Source: Royal Society of Chemistry journal article supplement (doi:10.1039/c5ra14513a), 2015-01-01
Supplement: c5ra14513a1.pdf [file c5ra14513a1.pdf]

***Electronic Supplementary Information for***

**Highly Flexible and Transparent Metal Grids Made of Metal Nanowire Networks**

Chulhee Lee,<sup>a</sup> Chuntae Kim,<sup>a</sup> Minseok Jeong,<sup>b</sup> Jeonghyo Kim,<sup>c</sup> Jaewook Lee,<sup>d</sup> Jin-Woo Oh,<sup>a</sup> Jaebeom Lee,<sup>c</sup> Soo Hyung Kim,<sup>a</sup> Simon S. Park,<sup>d</sup> and Jong-Man Kim<sup>\*a</sup>

<sup>a</sup> Department of Nano Fusion Technology and BK21 Plus Nano Convergence Technology Division, Pusan National University, Busan 609-735, South Korea

<sup>b</sup> Department of Nanomechatronics Engineering, Pusan National University, Busan 609-735, South Korea

<sup>c</sup> Department of Cogno-Mechatronics Engineering, Pusan National University, Busan 609-735, South Korea

<sup>d</sup> Department of Mechanical and Manufacturing Engineering, University of Calgary, Calgary, Alberta T2N 1N4, Canada

\*Corresponding author: [jongkim@pusan.ac.kr](mailto:jongkim@pusan.ac.kr)

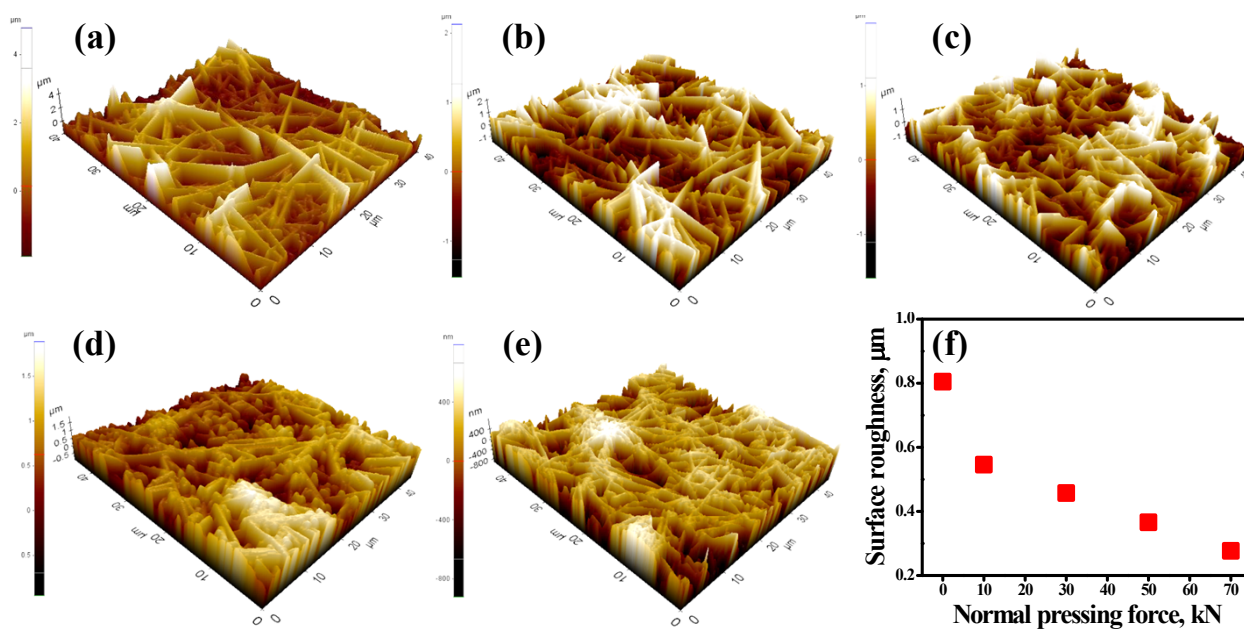

**Fig. S1** Surface morphologies of AgNW films with different pressing force. AFM images of AgNW films pressed at (a) 0 N, (b) 10 kN, (c) 30 kN, (d) 50 kN, and (e) 70 kN. (f) Average roughness (Ra) value as a function of pressing force.

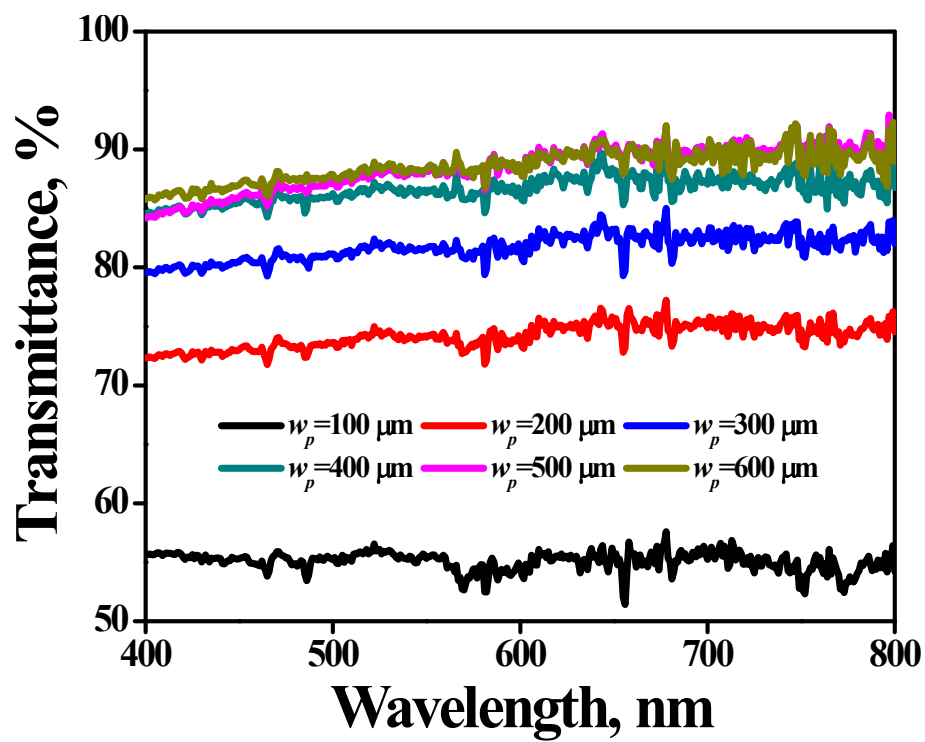

**Fig. S2** Transmittance spectra (400 nm to 800 nm) of AgNW MGs with different grid-to-grid pitch ( $w_p$ ) ranging from 100  $\mu\text{m}$  to 600  $\mu\text{m}$  and a step of 100  $\mu\text{m}$ .

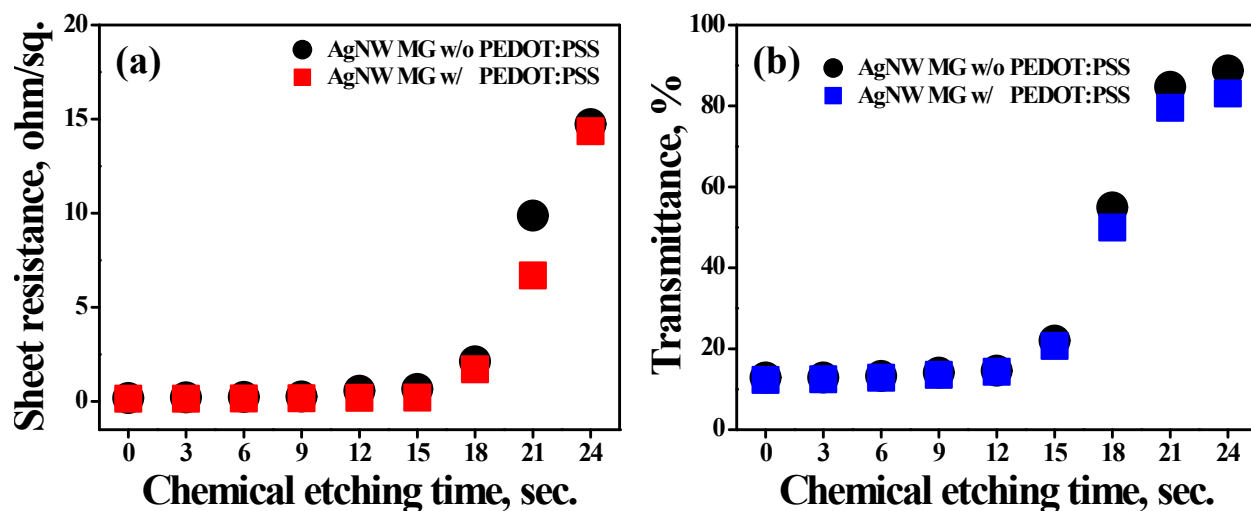

**Fig. S3** The optoelectronic performance of AgNW MGs processed with different chemical etching times of 0 sec to 24 sec with a step of 3 sec with and without PEDOT:PSS over-coating. (a) Sheet resistances and (b) transmittances at 550-nm wavelength of each AgNW MG.

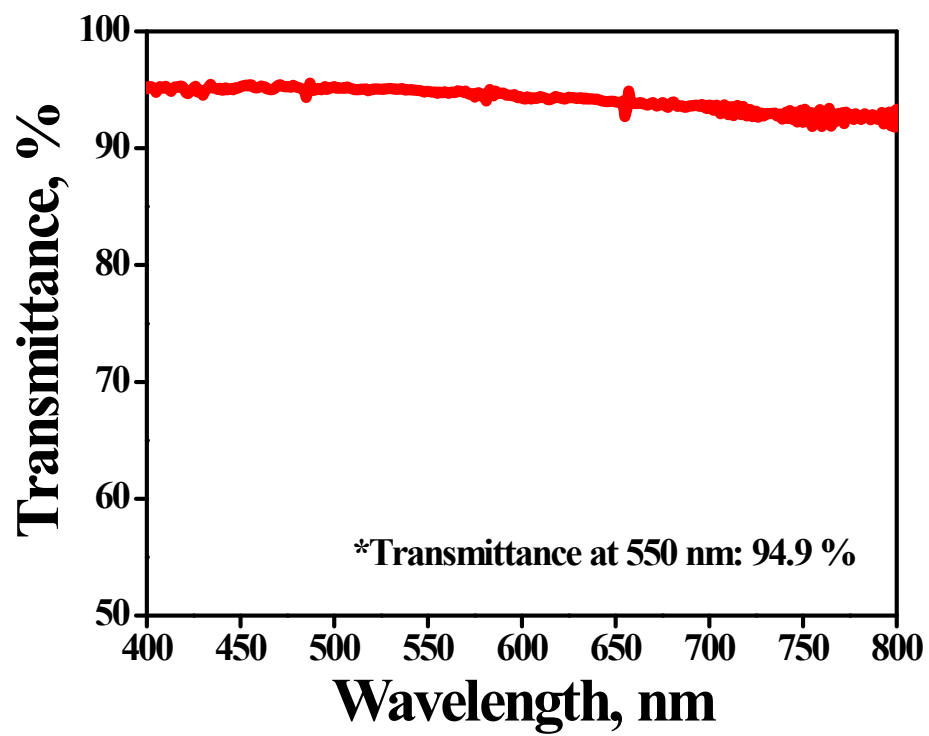

**Fig. S4** Transmittance spectrum (400 nm to 800 nm) of spray-coated PEDOT:PSS layer.

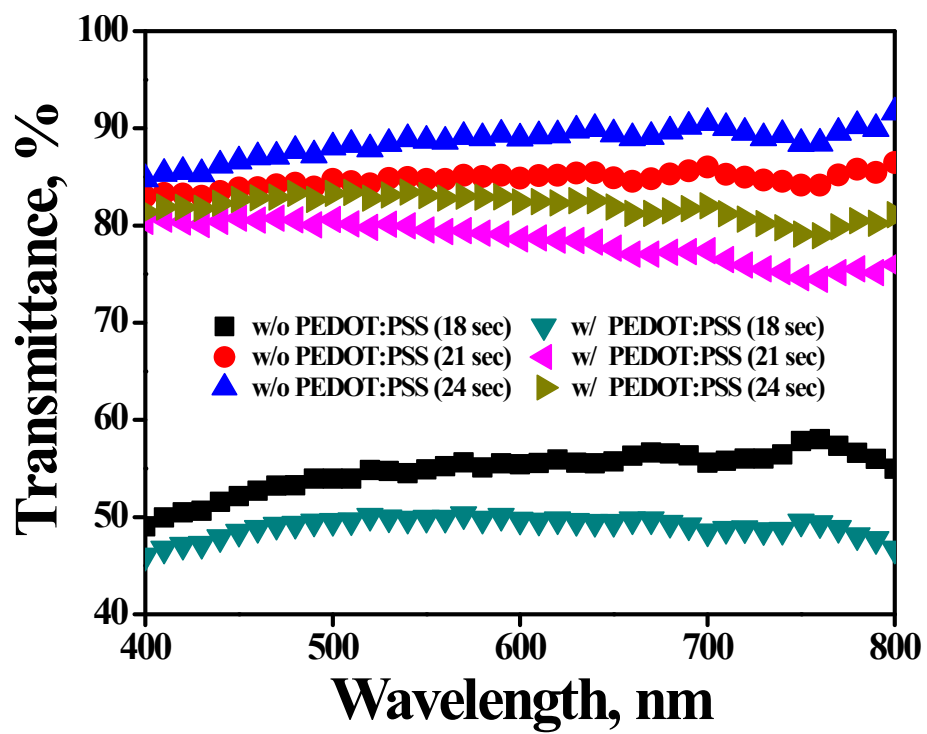

**Fig. S5** Transmittance spectra (400 nm to 800 nm) of AgNW MGs processed with different chemical etching time (18, 21, 24 sec) with and without PEDOT:PSS over-coating.

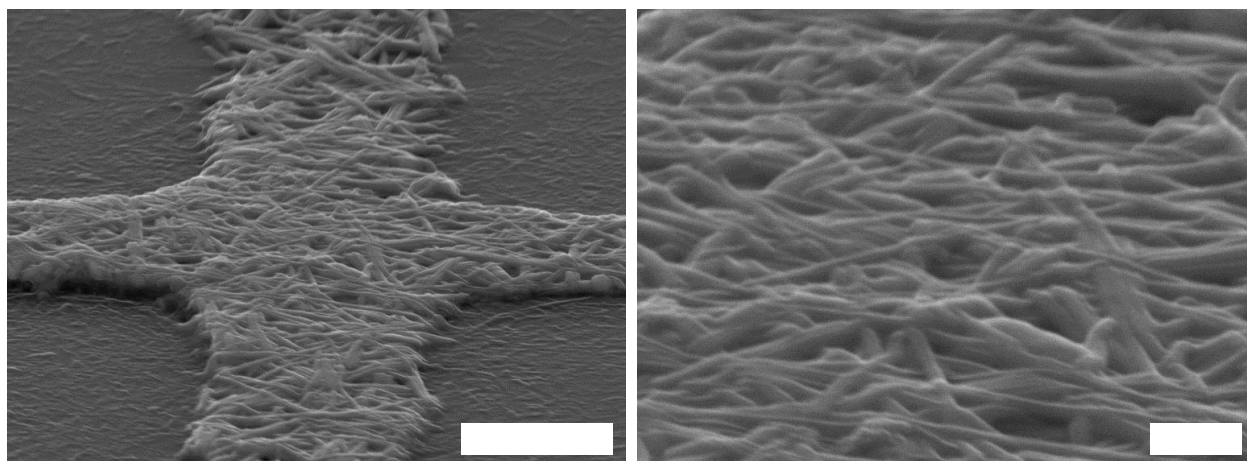

**Fig. S6** SEM images of PEDOT:PSS-coated AgNW MG after repetitive bending tests for up to 500 cycles (scale bars: 10  $\mu\text{m}$  (left), 2  $\mu\text{m}$  (right)).
